# Supplementary material for: Ultrathin nanosheet interconnected NixS6/Ni(OH)2 hybrid nanocages: successive self-sacrifice template fabrication and exceptional performance in supercapacitors
Source: Royal Society of Chemistry journal article supplement (doi:10.1039/d2tc00036a), 2022-01-01
Supplement: d2tc00036a1.pdf [file d2tc00036a1.pdf]

## Supplementary Materials

### **Ultrathin Nanosheet Interconnected Ni<sub>x</sub>S<sub>6</sub>/Ni(OH)<sub>2</sub> Hybrid Nanocages: Successive Self-sacrifice Template Fabrication and Exceptional Performance in Supercapacitors**

Yunpeng Xu<sup>a,#</sup>, Yue Liu<sup>a,c,#</sup>, Jianyong Ye<sup>a,b</sup>, Lizhong Wang<sup>b</sup>, Sheng Zhuo<sup>a</sup>, Weifan Chen<sup>a,b,c,\*</sup>

<sup>a</sup> School of Materials Science & Engineering, Nanchang University, Nanchang 330031, PR China

<sup>b</sup> Jiangxi Sun-Nano Advanced Materials Technology Co. Ltd., Ganzhou 341000, PR China

<sup>c</sup> Rare Earth Research Institute, Nanchang University, Nanchang 330031, PR China

<sup>#</sup>These authors contributed equally

<sup>\*</sup>Corresponding author: Weifan Chen (weifan-chen@163.com)

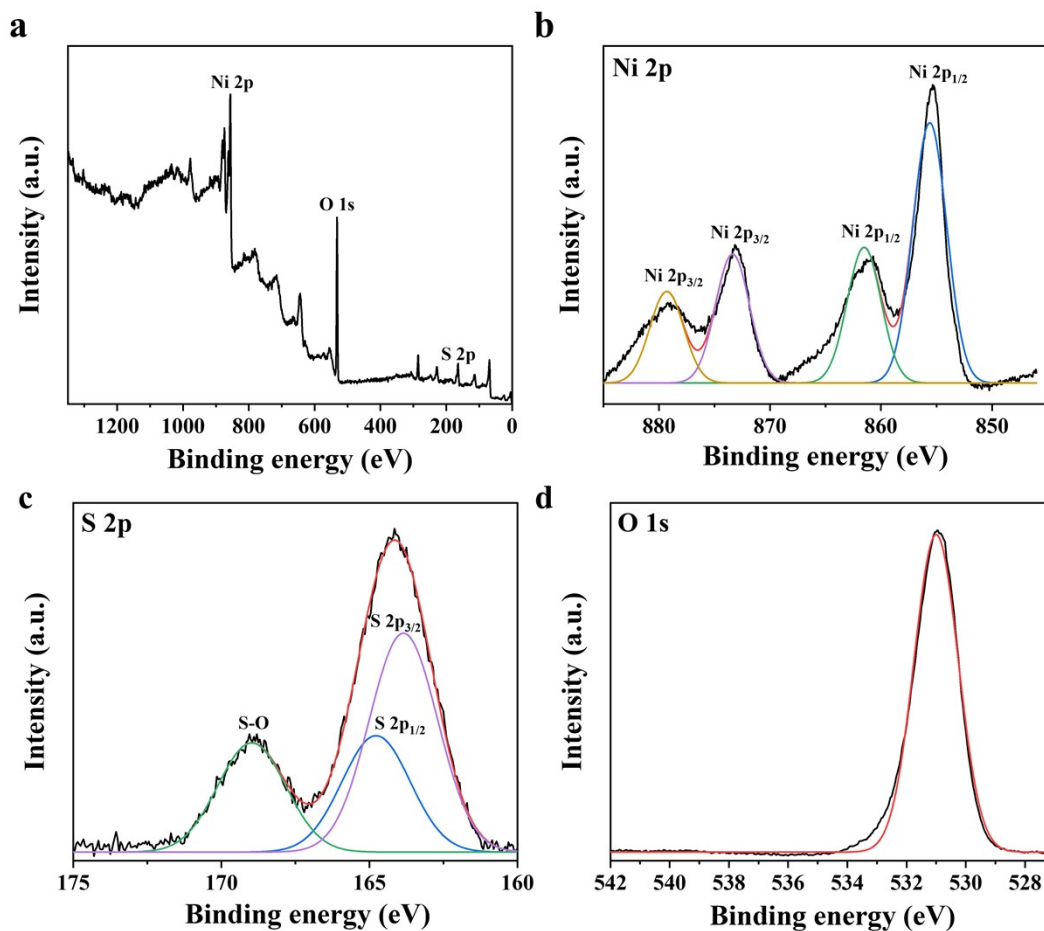

**Fig. S1.** XPS spectra of (a) broad scan spectrum, arrow scan of (b) Ni 2p, (c) S 2p and (d) O 1s of  $\text{Ni}_x\text{S}_6/\text{Ni}(\text{OH})_2$  hybrid material.

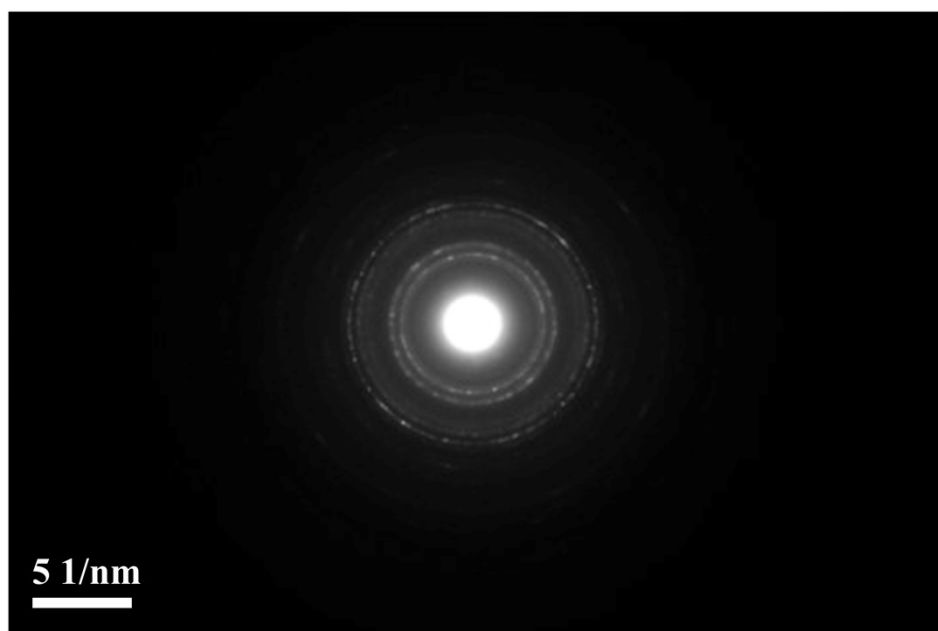

**Fig. S2.** Selected area electron diffraction (SAED) pattern of  $\text{Ni}_x\text{S}_6/\text{Ni}(\text{OH})_2$  hybrid material.

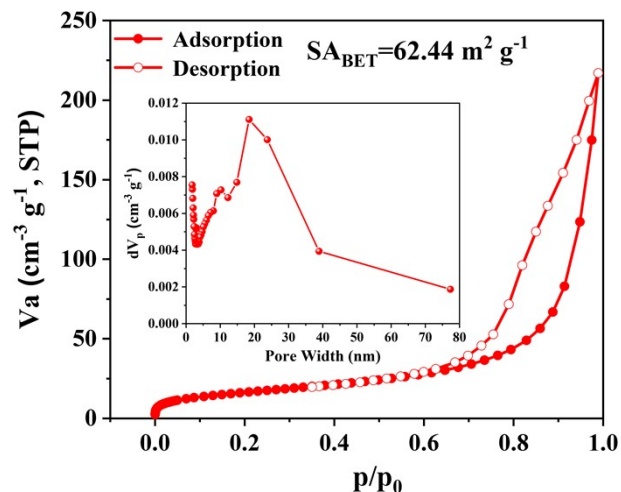

**Fig. S3.** Nitrogen adsorption–desorption isotherms with corresponding insert pore size distribution curves of  $\text{Ni}_x\text{S}_6/\text{Ni}(\text{OH})_2$  hybrid material.

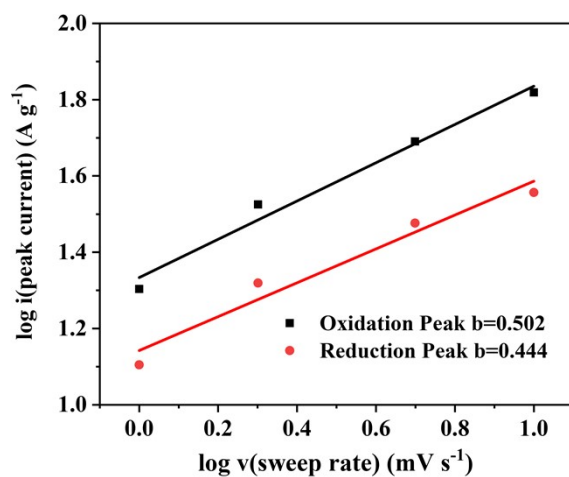

**Fig. S4.** Plot of rate law ( $\log i$  vs.  $\log v$ ) for the redox couple from 1 to  $10 \text{ mV s}^{-1}$  of  $\text{Ni}_x\text{S}_6/\text{Ni}(\text{OH})_2$  hybrid material.

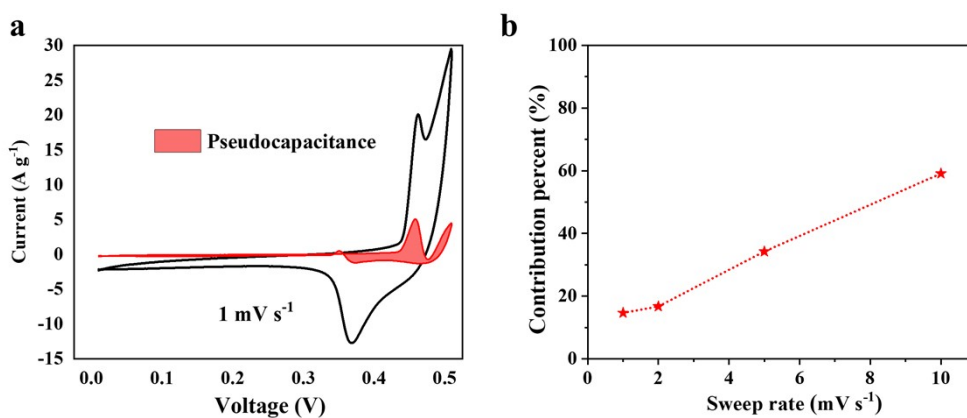

**Fig. S5.** (a) Capacitive contribution to charge storage at  $1 \text{ mV s}^{-1}$ , (b) the percentages of capacitive capacities at different scan rates of  $\text{Ni}_x\text{S}_6/\text{Ni}(\text{OH})_2$  hybrid material.

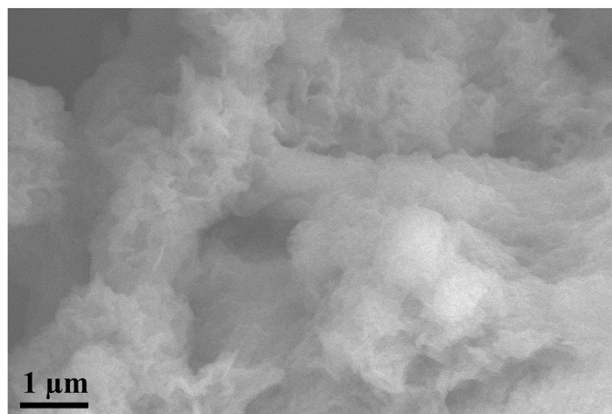

**Fig. S6.** SEM images of  $\text{Ni}_x\text{S}_6/\text{Ni}(\text{OH})_2$  hybrid material after GCD cycles.

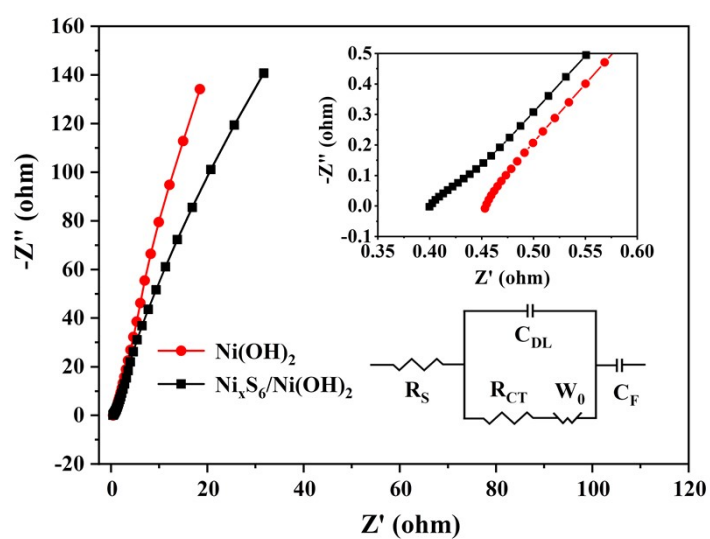

**Fig. S7.** EIS of the  $\text{Ni}(\text{OH})_2$  and  $\text{Ni}_x\text{S}_6/\text{Ni}(\text{OH})_2$  hybrid (the insets show the enlarged EIS at the high frequency region and the equivalent circuit corresponding the impedance spectra).

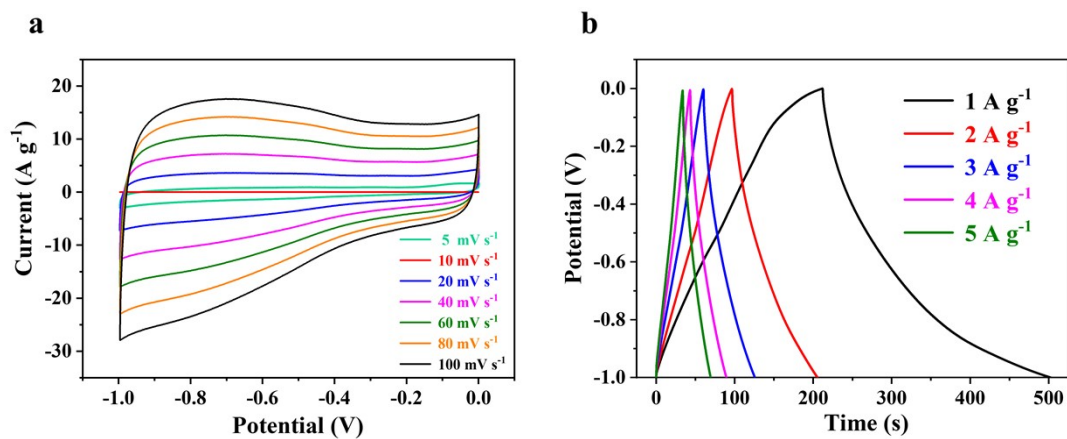

**Fig. S8.** (a) CV curves at various scan rates, (b) GCD curves at various current densities of active carbon in 6 M KOH aqueous electrolyte.

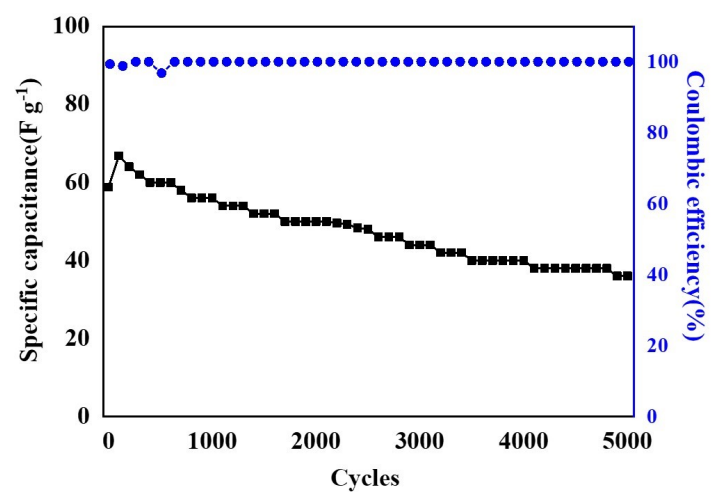

**Fig. S9.** Cyclic performance of the  $\text{Ni}_x\text{S}_6/\text{Ni}(\text{OH})_2//\text{AC}$  asymmetric supercapacitor at a constant current density of  $4 \text{ A g}^{-1}$ .
